# Supplementary material
Source: HighWire-hosted journal article supplement (http://thorax.bmjjournals.com/highwire/filestream/174124/field_highwire_adjunct_files/3/Sup_fig3.pdf)

Figure E3

A

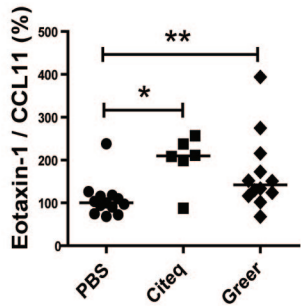

B

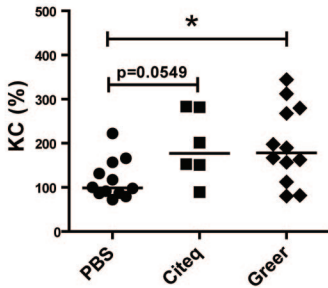

C

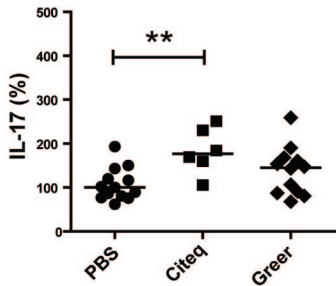

Supplement: Sup_fig3.pdf [file Sup_fig3.pdf]
